# Supplementary material for: Occurrence of pharmaceutical active compounds in sewage sludge from two urban wastewater treatment plants and their potential behaviour in agricultural soils
Source: Royal Society of Chemistry journal article supplement (doi:10.1039/d1ew00132a), 2021-01-01
Supplement: d1ew00132a1.pdf [file d1ew00132a1.pdf]

1 **Occurrence of pharmaceutical active compounds in sewage sludge**  
2 **from two urban wastewater treatment plants and their potential**  
3 **behaviour in agricultural soils**

4 Sofia Silva,<sup>\*a</sup> João A. Rodrigues,<sup>a</sup> Maria Rosário Coelho,<sup>b</sup> António Martins,<sup>b</sup> Eugénia Cardoso,<sup>c</sup> Vitor Vale  
5 Cardoso,<sup>a</sup> Maria João Benoliel,<sup>a</sup> Cristina M. M. Almeida,<sup>d,e</sup>  
6

7 **Supplementary Material**

8 **Fig. S1.** Effect of dispersant agent in the extraction efficiency of PhACs by ASE-SPE-LC-  
9 MS/MS. Chromatographic area of PhACs in two scales: (A) high scale and (B) short scale  
10 (n = 3).

11 **Fig. S2** Recovery of PhACs exposed at different temperatures and analyzed by LC-MS/MS  
12 (n = 3).

13 **Fig. S3.** Areas of PhACs extracted from sludges at different temperatures by ASE and  
14 analyzed by SPE-LC-MS/MS. Chromatographic area of PhACs in two scales: (A) high scale  
15 and (B) short scale (n = 3).

16 **Fig. S4.** Areas of PhACs extracted from sludges with two ratios ACN/H<sub>2</sub>O (70/30 and  
17 90/10, v/v) by ASE- SPE-LC-MS/MS. Chromatographic area of PhACs in two scales: (A)  
18 high scale and (B) short scale (n = 3).

19 **Table S1.** Comparison of validated ASE-SPE-UPLC-MS/MS method with other methods  
20 to quantify PhACs in sludge samples.

21

22

23

24

25

26 **Fig .S1.**

27

(A)

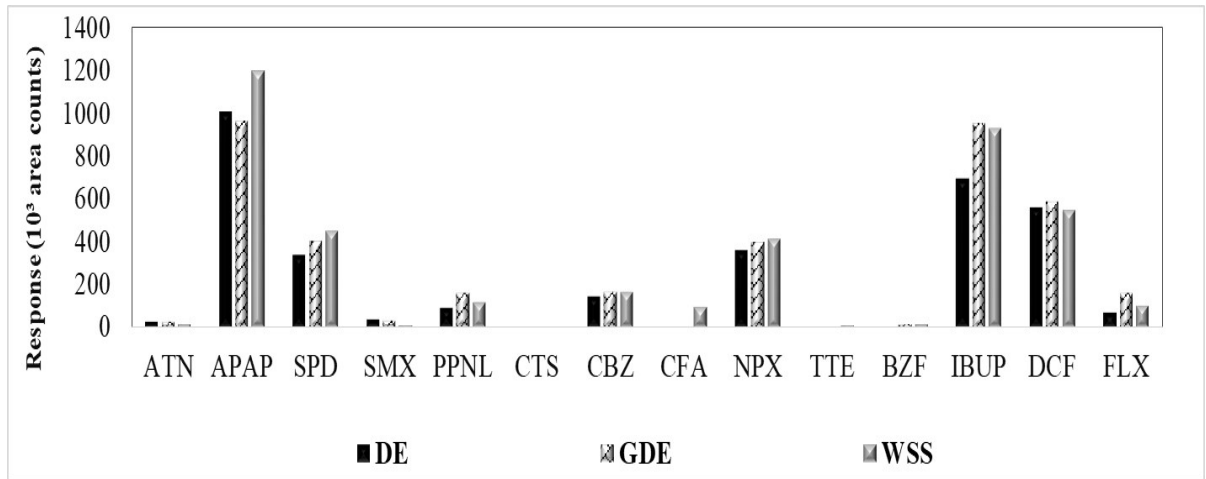

(B)

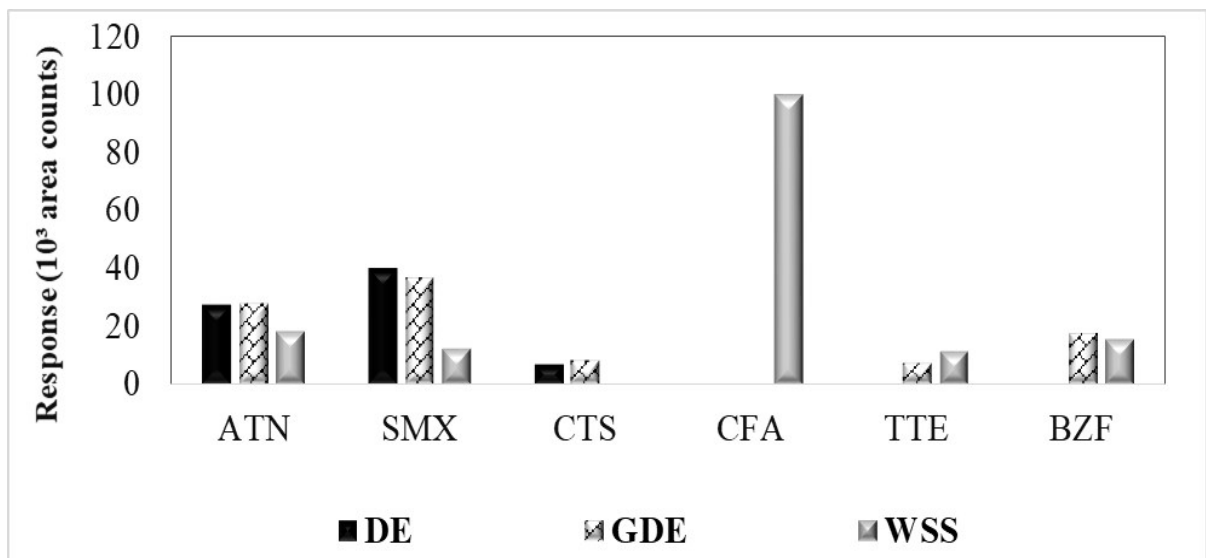

28

29

30 Fig .S2.

31

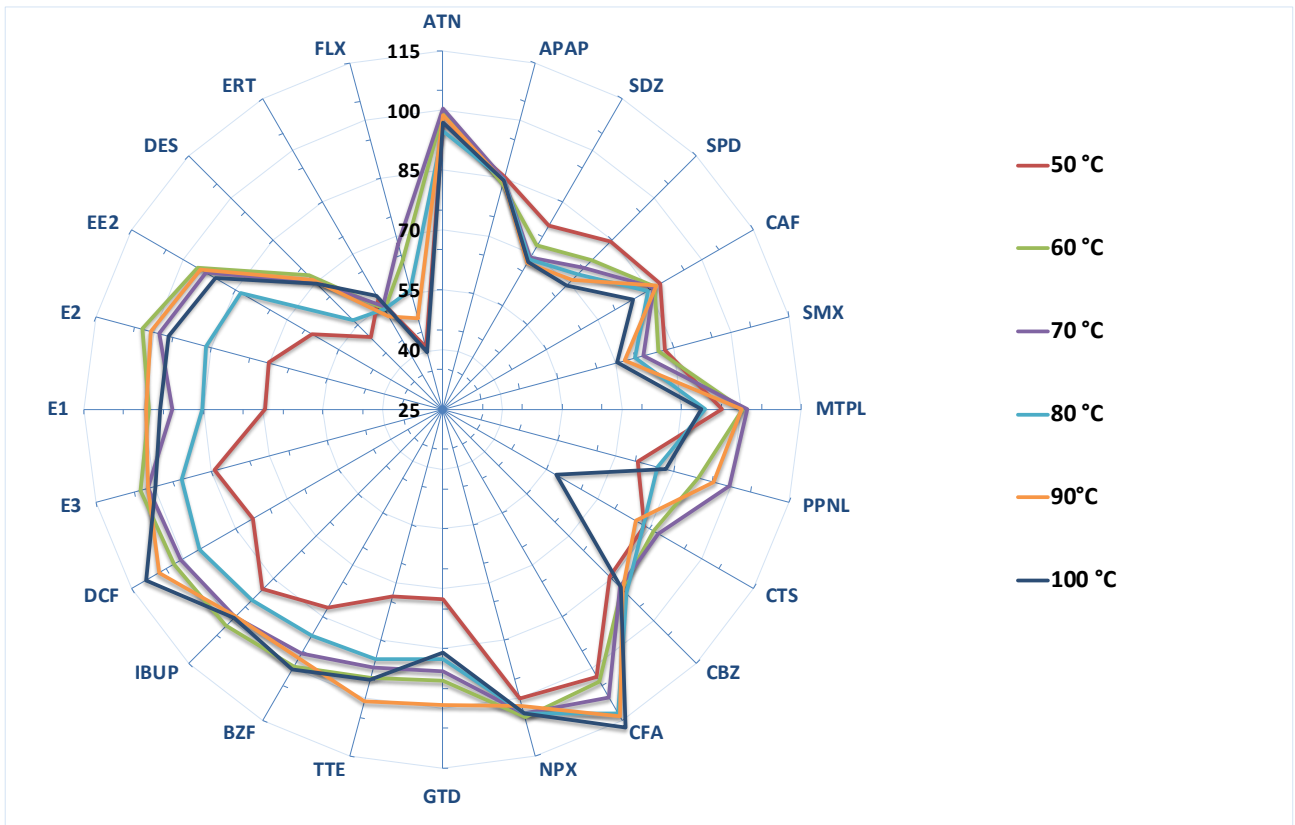

32

33

34 **Fig. S3.**

35

36

(A)

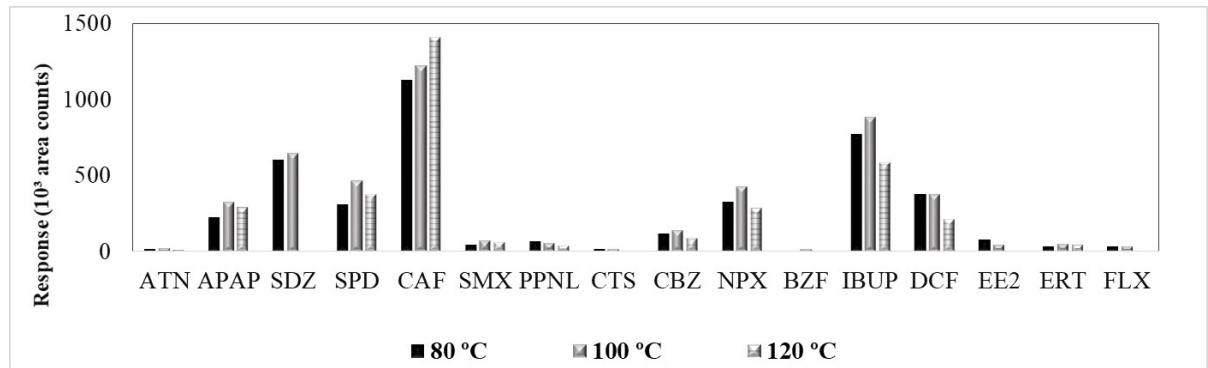

(B)

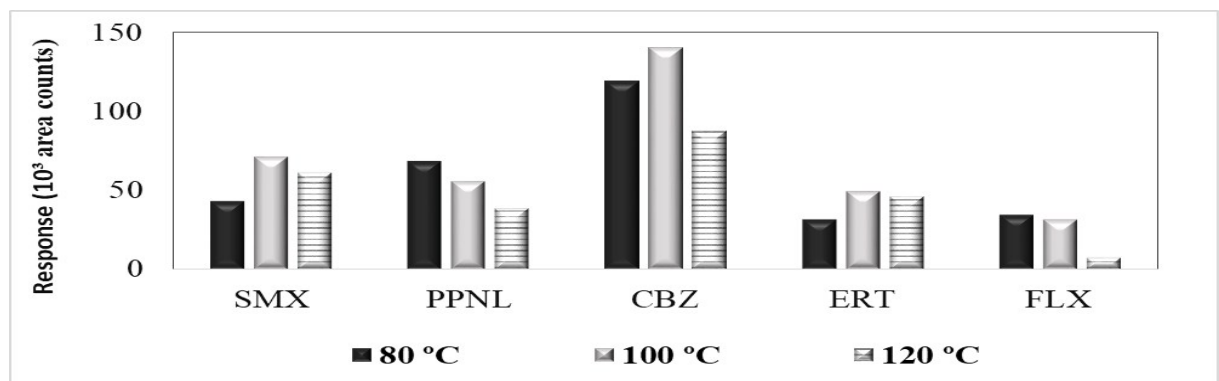

37

38

39 **Fig .S4.**

40

**(A)**

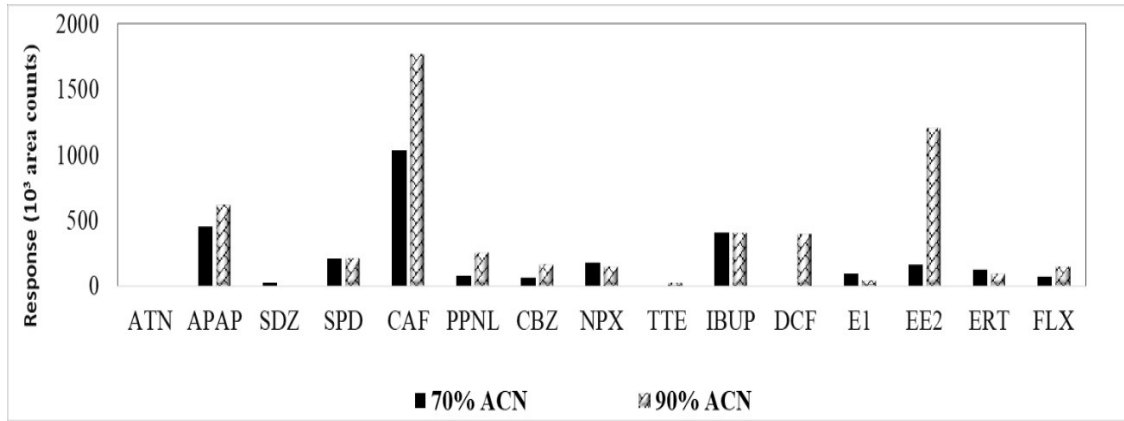

**(B)**

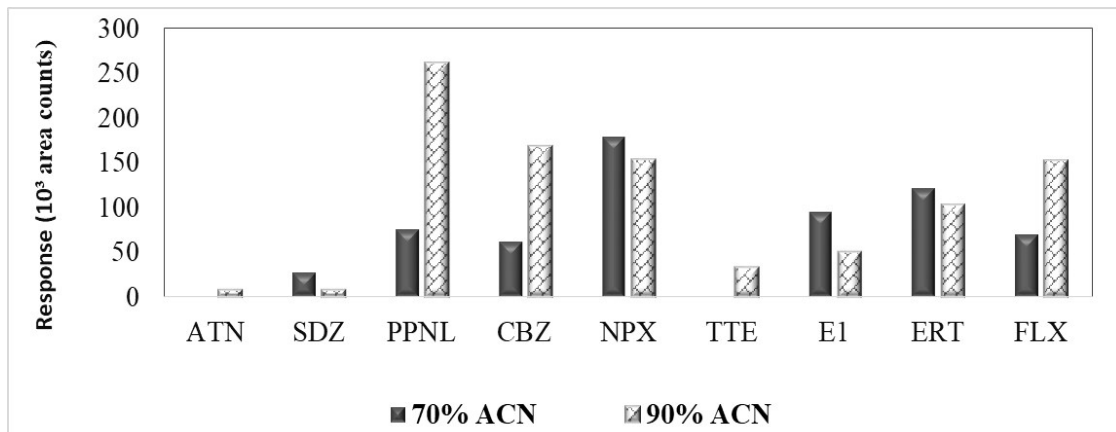

41

42

43

44

45

| Matrix                                                                                                                             | Nº PhACs<br>(Therapeutic classes)                                                                                                                                                                                                          | Extraction<br>configuration:<br>Phase system             | Instrumental<br>configuration | Nº<br>samples/<br>Nº WWTP | Cal., R <sup>2</sup>      | Precision                   | Recovery      | LOQ<br>(ng/g)   | Ref.      |
|------------------------------------------------------------------------------------------------------------------------------------|--------------------------------------------------------------------------------------------------------------------------------------------------------------------------------------------------------------------------------------------|----------------------------------------------------------|-------------------------------|---------------------------|---------------------------|-----------------------------|---------------|-----------------|-----------|
| Primary,<br>mixed liquor<br>(solid phase),<br>and<br>recirculated<br>sludge                                                        | 24 PhACs<br>(analgesic, anti-dyslipidemics<br>anticonvulsants, β-blockers<br>psychostimulants, NSAIDs,<br>corticosteroids, hormones<br>antidepressants, antibiotics)                                                                       | ASE/SPE<br>Oasis HLB<br>(200 mg)                         | UPLC-MS/MS                    | 67/2                      | SAC,<br>0.9980-<br>0.9999 | RSD <sub>r</sub><br>2.9-29% | 30-110%       | 1.66-34.5       | (A)       |
| Treated<br>sludge                                                                                                                  | 129 PhACs<br>(analgesics, antidepressants,<br>antibiotics, benzodiazepines,<br>antipsychotics, antiepileptics<br>NSAIDs)                                                                                                                   | USE<br>---                                               | UPLC-MS/MS                    | ---/5                     | ISC,<br>0.99              | RSD <sub>r</sub><br>3-20%   | 16-107%       | 2.7-66.3        | 27        |
| Treated<br>sludge                                                                                                                  | 25 PhACs<br>(fluoroquinolones, β-blockers,<br>tetracyclines, macrolides,<br>antiepileptics, lipid regulators,<br>stimulants, sulfonamides,)                                                                                                | USE/SPE<br>Oasis HLB<br>(500 mg)                         | UPLC-MS/MS                    | ---/1                     | ISC,<br>> 0.995           | RSD <sub>r</sub><br>3-13%   | 54-120%       | 0.02-1          | 22        |
| Primary,<br>secondary,<br>anaerobically-<br>digested,<br>mixed,<br>aerobically-<br>digested,<br>lagoon, and<br>composted<br>sludge | 22 PhACs<br>(NSAIDs, lipid regulators<br>antibiotics, antiepileptics,<br>stimulants, estrogens)                                                                                                                                            | USE/SPE<br>Oasis HLB<br>(60 mg)                          | HPLC-MS/MS                    | 28/10                     | ISC,<br>>0.992            | ---                         | 15-115%       | 0.05-26.4       | 24,<br>42 |
| Primary,<br>secondary,<br>and digested<br>sludge                                                                                   | 16 PhACs<br>(NSAIDs, antibiotics, beta-<br>blockers, lipid regulators,<br>antiepileptics, estrogens,<br>stimulants)                                                                                                                        | USE/SPE<br>Oasis HLB<br>(60 mg)                          | HPLC-DAD                      | 16/4                      | ISC,<br>>0.992            | ---                         | <15-<br>115%  | 0.4-360         | 23,<br>42 |
| Sewage and<br>livestock<br>sludge                                                                                                  | 24 PhACs<br>(analgesics, stimulants, anti-<br>seizures, NSAIDs, antibiotics)                                                                                                                                                               | USE/SPE<br>Oasis HLB<br>(200 mg)                         | UPLC-MS/MS                    | 40/16                     | ISC<br>>0.999             | RSD <sub>r</sub><br>2-19%   | ---           | 0.001-<br>0.122 | 21        |
| Mixed liquor<br>(liquid phase)                                                                                                     | 5 PhACs<br>(antidepressants, antibiotics)                                                                                                                                                                                                  | ---                                                      | HPLC-HRMS                     | ---/1                     | ISC<br>---                | RSD <sub>r</sub><br><20%    | ---           | ---             | 25        |
| Digested<br>sludge                                                                                                                 | 42 PhACs<br>(antidepressants, antibiotics,<br>anticancer, antihypertensives,<br>NSAIDs, analgesics, anti-<br>asthmatics, cardiovasculars,<br>diuretics, estrogens, antireflux<br>agents, lipid regulators, erectile<br>dysfunction agents) | ASE/SPE<br>Oasis MCX<br>(150 mg)<br>Oasis HLB<br>(60 mg) | HPLC-MS/MS                    | ---/12                    | ISC,<br>>0.998            | RSD<br>0.8-<br>46.4%        | 53.4-<br>146% | 0.12-<br>47.92  | 28        |
| Untreated,<br>and digested<br>sludge, and<br>compost                                                                               | 5 PhACs<br>(NSAIDs, antidepressants)                                                                                                                                                                                                       | USE/SPE<br>SDB-RPS disk<br>---                           | HPLC-MS/MS                    | ---/1                     | ---                       | ---                         | ---           | ---             | 29        |

46 **Table S1**

47  
48  
49  
50

**Legend:**

(A) Obtained data; (---) data not available; (DAD) diode array detector; (HLB) hydrophilic-lipophilic-balance; (HPLC) high performance liquid chromatography; (HRMS) high resolution mass spectrometry; (ISC) internal standard calibration (isotopically labelled internal standard as surrogates); (LOQ) limit of quantification; (MS) mass spectrometry; (MCX) mixed-mode/cationic-exchange; (MS/MS) triple quadrupole; (NSAIDs) nonsteroidal anti-

51 inflammatory drugs; **(RSD<sub>r</sub>)** relative standard deviation under repeatability conditions (intra-day precision); **(RSD<sub>R</sub>)** relative standard deviation under  
52 intermediation precision (inter-day precision); **(SAC)** standard addition calibration; **(SDB-RPS)** styrene divinylbenzene reversed phase sulfonate; **(SPE)**  
53 solid phase extraction; **(UHPLC)** ultra-high-performance liquid chromatography; **(USE)** ultrasonic extraction.  
54
